# Supplementary material for: Proteomic Identification of Plasma Components in Tachypleus tridentatus and Their Effects on the Longitudinal Bone Growth Rate in Rats
Source: MDPI journal article supplement (doi:10.3390/md21020111), 2023-02-03
Supplement: s1 [file s1]

---

Supplementary Information

**Proteomic Identification of Plasma Components in *Tachypleus tridentatus*  
and Their Effects on the Longitudinal Bone Growth Rate in Rats**

Jiang S. *et al.*

This file includes Supplementary Figure S1, Table S1 and Table S2.

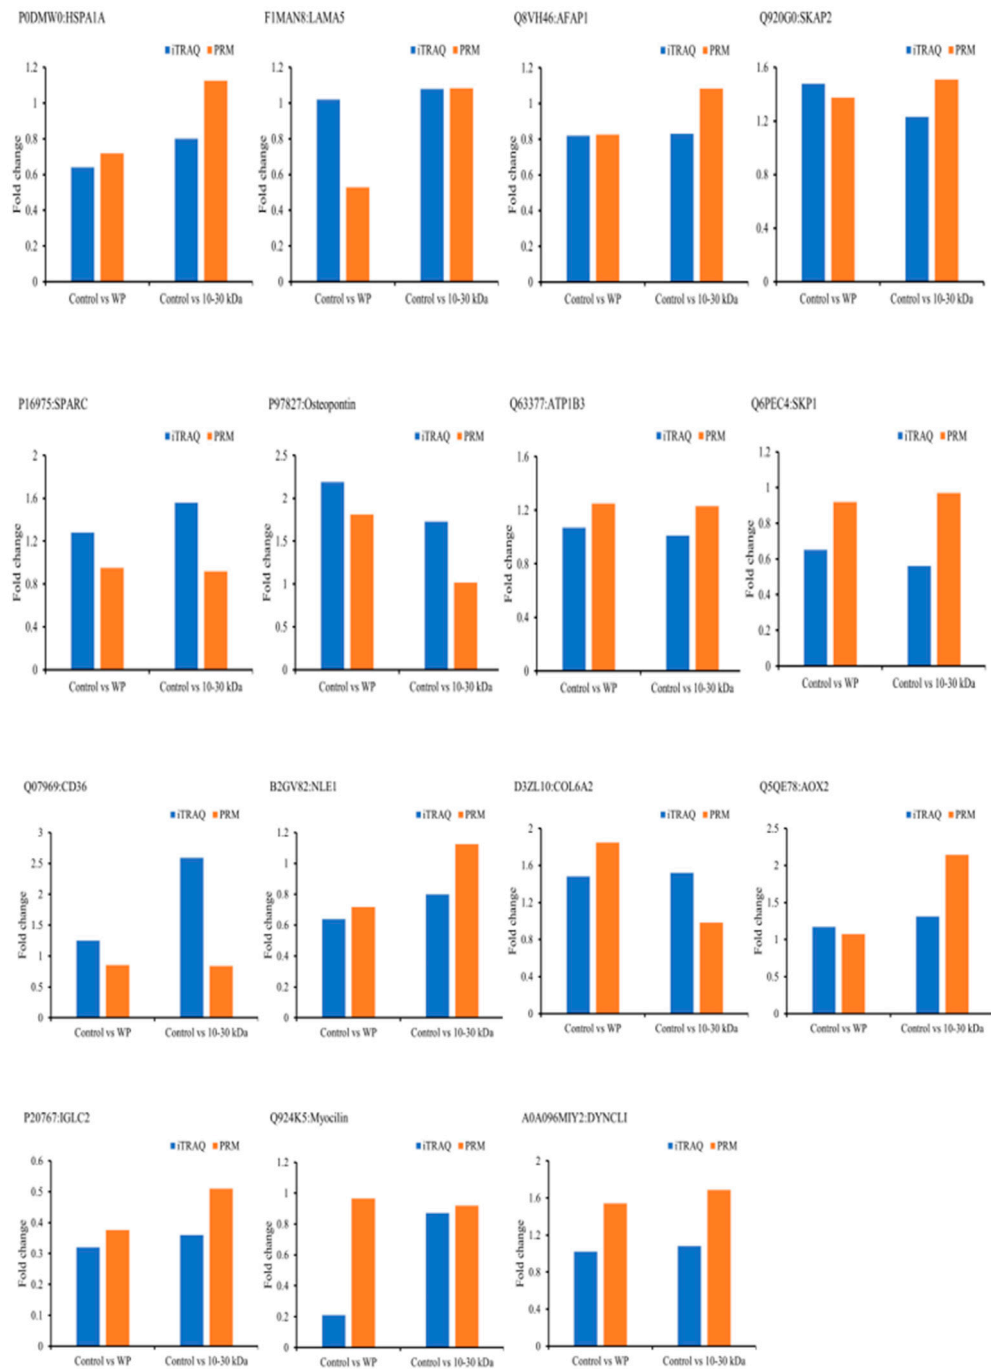

**Figure S1. 15 candidate proteins related to long bone growth were screened for PRM analysis. The 15 candidates include HSPA1A, LAMA5, AFAP1, SKAP2, SPARC, Osteopontin, ATP1B3, SKP1, CD36, NLE1, COL6A2, AOX2, IGLC2, Myocilin and DYNCL1.**

**Table S2. Significant difference protein in control-VS-whole plasma samples**

| Protein Number               | Protein Description                                               | Average Ratio | P value    |
|------------------------------|-------------------------------------------------------------------|---------------|------------|
| tr A0A1W2Q6L0 A0A1W2Q6L0_RAT | Mediator complex subunit 14                                       | 1.51          | 0.01553    |
| tr D3ZZC1 D3ZZC1_RAT         | RCG43947                                                          | 1.51          | 0.009149   |
| tr Q9R1X8 Q9R1X8_RAT         | PKC lambda protein                                                | 1.51          | 0.04923    |
| tr D3ZDP2 D3ZDP2_RAT         | Mitochondrial ribosomal protein L58                               | 1.51          | 0.006154   |
| sp P24594 IBP5_RAT           | Insulin-like growth factor-binding protein 5                      | 1.51          | 0.02528    |
| sp P59722 EGLN1_RAT          | Egl nine homolog 1                                                | 1.51          | 0.0259     |
| tr B2RZD4 B2RZD4_RAT         | 60S ribosomal protein L34                                         | 1.51          | 0.04743    |
| sp P09650 MCPT1_RAT          | Mast cell protease 1                                              | 1.52          | 0.01335    |
| sp P69478 CHSTB_RAT          | Carbohydrate sulfotransferase 11                                  | 1.52          | 0.02526    |
| tr D4A9I7 D4A9I7_RAT         | Leucine-rich repeat-containing 3B                                 | 1.52          | 0.03867    |
| sp Q9Z0W5 PACN1_RAT          | Protein kinase C and casein kinase substrate in neurons protein 1 | 1.52          | 0.0002775  |
| tr B5DFK8 B5DFK8_RAT         | Pdxcl protein                                                     | 1.52          | 0.003978   |
| sp P02680 FIBG_RAT           | Fibrinogen gamma chain                                            | 1.52          | 0.02739    |
| tr D3ZQQ2 D3ZQQ2_RAT         | WIZ zinc finger                                                   | 1.53          | 0.01944    |
| tr A0A0G2JYL4 A0A0G2JYL4_RAT | Prolyl 4-hydroxylase subunit alpha 2                              | 1.53          | 0.01589    |
| tr Q2I6B0 Q2I6B0_RAT         | V-type proton ATPase subunit a                                    | 1.53          | 0.01975    |
| tr A0A0H2UI04 A0A0H2UI04_RAT | Probable inactive glycosyltransferase 25 family member 3          | 1.53          | 0.01809    |
| tr D3ZRM3 D3ZRM3_RAT         | Hexosyltransferase                                                | 1.53          | 0.01754    |
| sp Q6AYP7 5NT3B_RAT          | 7-methylguanosine phosphate-specific 5'-nucleotidase              | 1.53          | 0.04684    |
| sp Q8VH46 AFAP1_RAT          | Actin filament-associated protein 1                               | 1.53          | 0.009302   |
| sp Q5PQL5 PTSS1_RAT          | Phosphatidylserine synthase 1                                     | 1.53          | 0.04091    |
| sp Q5FVL0 VA0D2_RAT          | V-type proton ATPase subunit d 2                                  | 1.53          | 0.002971   |
| sp O88280 SLIT3_RAT          | Slit homolog 3 protein GN=Slit3                                   | 1.53          | 0.02147    |
| tr Q5RJR9 Q5RJR9_RAT         | Serine (Or cysteine) proteinase inhibitor, clade H, member 1      | 1.53          | 0.0009304  |
| tr O70509 O70509_RAT         | CD44 antigen                                                      | 1.54          | 0.002804   |
| tr A0A0G2JXC1 A0A0G2JXC1_RAT | Protein ERGIC-53                                                  | 1.54          | 0.0005437  |
| sp P61751 ARF4_RAT           | ADP-ribosylation factor 4                                         | 1.54          | 0.002999   |
| tr A0A0G2K7L2 A0A0G2K7L2_RAT | Immunoglobulin superfamily, member 3                              | 1.55          | 0.003512   |
| sp Q9QYU2 EFTS_RAT           | Elongation factor Ts, mitochondrial                               | 1.55          | 0.00004569 |
| tr G3V803 G3V803_RAT         | Cadherin-2                                                        | 1.55          | 0.02242    |
| sp D3ZCL3 RU1C_RAT           | U1 small nuclear ribonucleoprotein C                              | 1.55          | 0.01143    |

|                              |                                                          |      |            |
|------------------------------|----------------------------------------------------------|------|------------|
| tr Q6AY18 Q6AY18_RAT         | SAR1 gene homolog A                                      | 1.55 | 0.04424    |
| sp O70535 LIFR_RAT           | Leukemia inhibitory factor receptor                      | 1.55 | 0.01509    |
| tr Q6P7B6 Q6P7B6_RAT         | Ephrin B1                                                | 1.55 | 0.01299    |
| sp P05426 RL7_RAT            | 60S ribosomal protein L7                                 | 1.56 | 0.03821    |
| tr F1M798 F1M798_RAT         | Metalloendopeptidase                                     | 1.56 | 0.01024    |
| sp P14480 FIBB_RAT           | Fibrinogen beta chain                                    | 1.56 | 0.01015    |
| sp Q9R0C5 GALT7_RAT          | N-acetylgalactosaminyltransferase 7                      | 1.56 | 0.001316   |
| tr D4ADP9 D4ADP9_RAT         | Coatomer subunit zeta                                    | 1.56 | 0.002394   |
| tr D3Z9K6 D3Z9K6_RAT         | Family with sequence similarity 180, member A            | 1.56 | 0.01033    |
| sp P23097 MMP13_RAT          | Collagenase 3 (Fragment)                                 | 1.56 | 0.001485   |
| tr D4A6W6 D4A6W6_RAT         | Ribosomal_L2_C domain-containing protein                 | 1.56 | 0.01295    |
| sp P31211 CBG_RAT            | Corticosteroid-binding globulin                          | 1.57 | 0.04139    |
| tr A0A0G2K5T3 A0A0G2K5T3_RAT | Phosphatidylinositol 4,5-bisphosphate 3-kinase catalytic | 1.57 | 0.02849    |
| tr A0A0G2JZS9 A0A0G2JZS9_RAT | Ig-like domain-containing protein                        | 1.57 | 0.001081   |
| tr Q0QEW8 Q0QEW8_RAT         | Ribosomal protein L18 (Fragment)                         | 1.57 | 0.02815    |
| tr D3ZMR0 D3ZMR0_RAT         | Olfactomedin-like 2A                                     | 1.58 | 0.003912   |
| sp P07897 PGCA_RAT           | Aggrecan core protein                                    | 1.58 | 0.002414   |
| sp Q63377 AT1B3_RAT          | Sodium/potassium-transporting ATPase subunit beta-3      | 1.58 | 0.0001596  |
| tr G3V7V5 G3V7V5_RAT         | Peptidylprolyl isomerase                                 | 1.58 | 0.01484    |
| tr G3V6R4 G3V6R4_RAT         | Leucine-rich repeat-containing 1                         | 1.59 | 0.01318    |
| tr Q66H06 Q66H06_RAT         | Tetraspanin                                              | 1.59 | 0.03541    |
| tr A0A292G0W2 A0A292G0W2_RAT | Gai-interacting protein                                  | 1.59 | 0.04169    |
| sp P24090 FETUA_RAT          | Alpha-2-HS-glycoprotein                                  | 1.6  | 0.003106   |
| sp P61621 S61A1_RAT          | Protein transport protein Sec61 subunit alpha isoform 1  | 1.6  | 0.00567    |
| tr Q63109 Q63109_RAT         | Coagulation factor X (Fragment)                          | 1.61 | 0.007705   |
| sp P07861 NEP_RAT            | Neprilysin                                               | 1.61 | 0.007377   |
| sp Q9R1J8 P3H1_RAT           | Prolyl 3-hydroxylase 1                                   | 1.61 | 0.00003234 |
| tr M0R3V4 M0R3V4_RAT         | Myeloid-derived growth factor                            | 1.62 | 0.03361    |
| tr A0A0G2K7C2 A0A0G2K7C2_RAT | Kinesin family member 20B                                | 1.62 | 0.04472    |
| tr F1M853 F1M853_RAT         | Ribosome-binding protein 1                               | 1.62 | 0.0003963  |
| sp O35186 CATK_RAT           | Cathepsin K                                              | 1.62 | 0.01286    |
| tr B0K010 B0K010_RAT         | Thioredoxin domain-containing 17                         | 1.63 | 0.02971    |
| sp P31720 C1QA_RAT           | Complement C1q subcomponent subunit A                    | 1.63 | 0.04097    |

|                              |                                                                   |      |           |
|------------------------------|-------------------------------------------------------------------|------|-----------|
| tr A0A0H2UHM3 A0A0H2UHM3_RAT | Haptoglobin                                                       | 1.64 | 0.03299   |
| tr F1LSW7 F1LSW7_RAT         | 60S ribosomal protein L14                                         | 1.64 | 0.04956   |
| sp P07335 KCRB_RAT           | Creatine kinase B-type                                            | 1.64 | 0.02534   |
| tr A0A0G2K7I1 A0A0G2K7I1_RAT | Ig-like domain-containing protein                                 | 1.65 | 0.04929   |
| tr D4A4L6 D4A4L6_RAT         | Ig-like domain-containing protein                                 | 1.65 | 0.0002873 |
| sp Q5RK27 S12A7_RAT          | Solute carrier family 12 member 7                                 | 1.66 | 0.0406    |
| sp Q4JM44 SMS2_RAT           | Phosphatidylcholine:ceramide cholinephosphotransferase 2          | 1.66 | 0.006487  |
| sp P61314 RL15_RAT           | 60S ribosomal protein L15                                         | 1.66 | 0.01683   |
| tr G3V7K5 G3V7K5_RAT         | NPC intracellular cholesterol transporter 1                       | 1.67 | 0.006344  |
| tr F1LN88 F1LN88_RAT         | Aldehyde dehydrogenase, mitochondrial                             | 1.67 | 0.006583  |
| tr B1WBV5 B1WBV5_RAT         | Epiphygan                                                         | 1.67 | 0.03172   |
| tr D4A8L3 D4A8L3_RAT         | Sphingomyelin phosphodiesterase 3                                 | 1.68 | 0.0004729 |
| tr A7M6E9 A7M6E9_RAT         | Semaphorin 3D                                                     | 1.68 | 0.001053  |
| tr A0A0G2K1L8 A0A0G2K1L8_RAT | Brain acid soluble protein 1                                      | 1.68 | 0.01871   |
| sp O35276 NRP2_RAT           | Neuropilin-2                                                      | 1.68 | 0.004991  |
| tr F1LVV3 F1LVV3_RAT         | RAN-binding protein 9                                             | 1.68 | 0.03055   |
| sp P84100 RL19_RAT           | 60S ribosomal protein L19                                         | 1.68 | 0.0431    |
| tr D3ZP13 D3ZP13_RAT         | Sulfhydryl oxidase                                                | 1.69 | 0.003651  |
| tr A0A0G2K2S2 A0A0G2K2S2_RAT | Solute carrier family 2, facilitated glucose transporter member 1 | 1.69 | 0.01126   |
| sp Q5BJP3 UFM1_RAT           | Ubiquitin-fold modifier 1                                         | 1.69 | 0.001307  |
| tr Q7TQ70 Q7TQ70_RAT         | Ac1873                                                            | 1.7  | 0.01655   |
| tr D3Z9Z7 D3Z9Z7_RAT         | Collagen beta(1-O)galactosyltransferase 2                         | 1.7  | 0.005645  |
| tr D3ZF11 D3ZF11_RAT         | Hepatitis B virus x interacting protein                           | 1.71 | 0.04951   |
| tr A0A0G2JVA4 A0A0G2JVA4_RAT | Procollagen-lysine,2-oxoglutarate 5-dioxygenase 2                 | 1.72 | 0.002331  |
| sp Q6AYF6 GL8D1_RAT          | Glycosyltransferase 8 domain-containing protein 1                 | 1.72 | 0.0004893 |
| sp O55164 MPDZ_RAT           | Multiple PDZ domain protein                                       | 1.72 | 0.0002163 |
| tr D4A5Z6 D4A5Z6_RAT         | Coiled-coil domain-containing 34                                  | 1.72 | 0.04846   |
| tr B5DEF3 B5DEF3_RAT         | Gamma-glutamyl carboxylase                                        | 1.72 | 0.0108    |
| sp Q66H78 PXYP1_RAT          | 2-phosphoxylose phosphatase 1                                     | 1.73 | 0.03293   |
| tr F6T0B3 F6T0B3_RAT         | Collagen type XI alpha 2 chain                                    | 1.73 | 0.00104   |
| tr M0R5U6 M0R5U6_RAT         | Torsin-1A-interacting protein 2                                   | 1.74 | 0.0346    |
| tr D3ZWI0 D3ZWI0_RAT         | Cell migration-inducing hyaluronidase                             | 1.76 | 0.02429   |
| tr O88550 O88550_RAT         | Caspase 7                                                         | 1.76 | 0.04613   |

|                              |                                                                                 |      |            |
|------------------------------|---------------------------------------------------------------------------------|------|------------|
| sp Q62703 RCN2_RAT           | Reticulocalbin-2                                                                | 1.79 | 0.005079   |
| sp P61354 RL27_RAT           | 60S ribosomal protein L27                                                       | 1.8  | 0.02577    |
| tr A0A0G2JX36 A0A0G2JX36_RAT | Ig-like domain-containing protein                                               | 1.8  | 0.002145   |
| sp P63182 CBLN1_RAT          | Cerebellin-1                                                                    | 1.82 | 0.04584    |
| tr D4A275 D4A275_RAT         | Glucoside xylosyltransferase 2                                                  | 1.84 | 0.006836   |
| tr D3ZKR8 D3ZKR8_RAT         | Protein kish                                                                    | 1.85 | 0.00003605 |
| tr A0A0G2K7A5 A0A0G2K7A5_RAT | Collagen type X alpha 1 chain                                                   | 1.85 | 0.00172    |
| sp P16391 HA12_RAT           | RT1 class I histocompatibility antigen                                          | 1.85 | 0.002267   |
| sp Q62632 FSTL1_RAT          | Follistatin-related protein 1                                                   | 1.86 | 0.006747   |
| tr Q5U2V1 Q5U2V1_RAT         | Peptidylprolyl isomerase                                                        | 1.86 | 0.00125    |
| sp P08289 PPBT_RAT           | Alkaline phosphatase, tissue-nonspecific isozyme                                | 1.86 | 0.0002146  |
| sp O08776 NDUF3_RAT          | NADH dehydrogenase1 alpha subcomplex assembly factor 3                          | 1.87 | 0.01613    |
| sp P97586 CGRE1_RAT          | Cell growth regulator with EF hand domain protein 1                             | 1.87 | 0.001057   |
| tr F1LNY3 F1LNY3_RAT         | Neural cell adhesion molecule 1                                                 | 1.88 | 0.002889   |
| tr F1LPB5 F1LPB5_RAT         | kDEL endoplasmic reticulum protein retention receptor 3                         | 1.88 | 0.03893    |
| tr D3ZH41 D3ZH41_RAT         | Cytoskeleton-associated protein 4                                               | 1.9  | 0.0005229  |
| sp Q9WVC1 SLIT2_RAT          | Slit homolog 2 protein                                                          | 1.91 | 0.002245   |
| tr F1M7F7 F1M7F7_RAT         | Complement component C6                                                         | 1.94 | 0.01856    |
| tr D3ZQP6 D3ZQP6_RAT         | Sema domain, immunoglobulin domain (Ig), and GPI membrane anchor                | 1.94 | 0.008988   |
| tr A0A096P6L8 A0A096P6L8_RAT | Fibronectin                                                                     | 1.94 | 0.001105   |
| sp Q6AY25 TMED3_RAT          | Transmembrane emp24 domain-containing protein 3                                 | 1.95 | 0.0001436  |
| sp Q8CG08 CTHR1_RAT          | Collagen triple helix repeat-containing protein 1                               | 1.95 | 0.0004893  |
| tr G3V723 G3V723_RAT         | Phosphate regulating gene with homologies to endopeptidases on the X chromosome | 1.95 | 0.0009709  |
| tr Q4FZY1 Q4FZY1_RAT         | Cd68 molecule                                                                   | 1.95 | 0.02132    |
| sp P62083 RS7_RAT            | 40S ribosomal protein S7                                                        | 1.97 | 0.02133    |
| tr D4ADS6 D4ADS6_RAT         | Integrator complex subunit 7                                                    | 1.97 | 0.02723    |
| sp Q5PQX0 UXS1_RAT           | UDP-glucuronic acid decarboxylase 1                                             | 1.98 | 0.0177     |
| tr D3Z9M5 D3Z9M5_RAT         | Peptidylprolyl isomerase                                                        | 1.98 | 0.004331   |
| tr A0A0G2JSM1 A0A0G2JSM1_RAT | Ratsg2                                                                          | 1.99 | 0.0001051  |
| tr D4A4H5 D4A4H5_RAT         | Stromal cell derived factor 2                                                   | 2    | 0.007248   |

|                              |                                                         |      |            |
|------------------------------|---------------------------------------------------------|------|------------|
| sp Q9EPH1 A1BG_RAT           | Alpha-1B-glycoprotein                                   | 2.1  | 0.0003004  |
| tr A0A096MJU4 A0A096MJU4_RAT | Solute carrier family 37 member 2                       | 2.13 | 0.01224    |
| tr A0A0G2K4I9 A0A0G2K4I9_RAT | Coagulation factor XI                                   | 2.18 | 0.00006485 |
| tr A0A0G2K9Y0 A0A0G2K9Y0_RAT | Immunoglobulin heavy constant mu                        | 2.19 | 0.003542   |
| tr D3ZKU5 D3ZKU5_RAT         | Uncharacterized protein                                 | 2.21 | 0.02498    |
| tr G3V7N9 G3V7N9_RAT         | Adiponectin a                                           | 2.27 | 0.03887    |
| tr A0JPL7 A0JPL7_RAT         | Leukocyte cell-derived chemotaxin 1                     | 2.28 | 0.008315   |
| sp P20909 COBA1_RAT          | Collagen alpha-1(XI) chain                              | 2.28 | 0.0004749  |
| tr B1WBR1 B1WBR1_RAT         | Golgi reassembly-stacking protein 1                     | 2.31 | 0.006278   |
| sp Q6IE14 TM11L_RAT          | Transmembrane protease serine 11B-like protein          | 2.34 | 0.0009055  |
| tr Q6IMK1 Q6IMK1_RAT         | Sp7 transcription factor                                | 2.41 | 0.02133    |
| tr D3ZFK6 D3ZFK6_RAT         | Autophagy-related 16-like 1                             | 2.55 | 0.02689    |
| tr Q7TNA8 Q7TNA8_RAT         | L-lactate dehydrogenase                                 | 2.61 | 0.02465    |
| sp P56374 CRBA4_RAT          | Beta-crystallin A4                                      | 2.65 | 0.002346   |
| sp P34900 SDC2_RAT           | Syndecan-2                                              | 2.7  | 0.003389   |
| sp P17078 RL35_RAT           | 60S ribosomal protein L35                               | 2.73 | 0.04972    |
| tr O35515 O35515_RAT         | C-met/hepatocyte growth factor receptor                 | 2.89 | 0.001192   |
| sp P60572 PANX3_RAT          | Pannexin-3                                              | 2.99 | 0.001516   |
| tr F1LUV9 F1LUV9_RAT         | Neural cell adhesion molecule 1                         | 3    | 0.006539   |
| sp O08722 UNC5B_RAT          | Netrin receptor UNC5B                                   | 3.13 | 0.00363    |
| tr A0A0G2K8V0 A0A0G2K8V0_RAT | Protein tyrosine phosphatase, receptor type, MGN=Ptpm   | 3.77 | 0.0115     |
| tr Q58NB7 Q58NB7_RAT         | Retinoic acid receptor responder (Tazarotene induced) 1 | 4.08 | 0.000543   |
| tr B1H2A3 B1H2A3_RAT         | Bromodomain PHD finger transcription factor             | 0.26 | 0.003812   |
| sp Q9EQH5 CTBP2_RAT          | C-terminal-binding protein 2                            | 0.4  | 0.006807   |
| tr Q63910 Q63910_RAT         | Alpha globin                                            | 0.41 | 0.01095    |
| tr Q5EBA5 Q5EBA5_RAT         | Lipin 3                                                 | 0.46 | 0.00009122 |
| tr A0A0G2JZB7 A0A0G2JZB7_RAT | Neuron navigator 3                                      | 0.48 | 0.00609    |
| sp A0A0G2K0D3 LMOD1_RAT      | Leiomodlin-1                                            | 0.48 | 0.0462     |
| sp P06907 MYP0_RAT           | Myelin protein P0                                       | 0.49 | 0.00899    |
| sp O88831 KKCC2_RAT          | Calcium/calmodulin-dependent protein kinase kinase 2    | 0.5  | 0.03585    |
| sp Q5XI50 MARCH7_RAT         | E3 ubiquitin-protein ligase MARCH7                      | 0.51 | 0.02382    |
| sp P19527 NFL_RAT            | Neurofilament light polypeptide                         | 0.51 | 0.00348    |
| tr D3ZDK4 D3ZDK4_RAT         | Angiopoietin-like 7                                     | 0.51 | 0.001431   |

|                              |                                                                                |      |             |
|------------------------------|--------------------------------------------------------------------------------|------|-------------|
| tr A0A0G2K1L0 A0A0G2K1L0_RAT | Tenascin C                                                                     | 0.53 | 0.01641     |
| sp P17988 ST1A1_RAT          | Sulfotransferase 1A1                                                           | 0.53 | 0.02154     |
| sp Q6PCT8 DHSD_RAT           | Succinate dehydrogenase [ubiquinone] cytochrome b small subunit, mitochondrial | 0.54 | 0.04886     |
| tr D3ZK72 D3ZK72_RAT         | Keratin-associated protein 16-5                                                | 0.56 | 0.002354    |
| sp Q08290 CNN1_RAT           | Calponin-1                                                                     | 0.56 | 0.02882     |
| sp P04638 APOA2_RAT          | Apolipoprotein A-II                                                            | 0.57 | 0.02191     |
| tr A0A0G2JVN7 A0A0G2JVN7_RAT | Oogenesin 1                                                                    | 0.57 | 0.02633     |
| tr D3ZKQ0 D3ZKQ0_RAT         | Nudix (Nucleoside diphosphate linked moiety X)-type motif 15                   | 0.57 | 0.0007321   |
| sp O88801 HOME2_RAT          | Homer protein homolog 2                                                        | 0.58 | 0.006055    |
| tr Q5PQK3 Q5PQK3_RAT         | Tripartite motif-containing 42                                                 | 0.58 | 0.01908     |
| sp P80432 COX7C_RAT          | Cytochrome c oxidase subunit 7C, mitochondrial                                 | 0.58 | 0.03041     |
| sp Q63228 GMFB_RAT           | Glia maturation factor beta                                                    | 0.58 | 0.004609    |
| sp Q6MG12 CF136_RAT          | Uncharacterized protein C6orf136 homolog                                       | 0.58 | 0.02408     |
| tr D3ZIA7 D3ZIA7_RAT         | Anterior gradient 2 (Xenopus laevis)                                           | 0.58 | 0.02767     |
| tr E9PTU4 E9PTU4_RAT         | Myosin-11                                                                      | 0.59 | 0.01848     |
| sp P04916 RET4_RAT           | Retinol-binding protein                                                        | 0.6  | 0.001988    |
| sp Q566C7 NUDT3_RAT          | Diphosphoinositol polyphosphate phosphohydrolase 1                             | 0.6  | 0.002305    |
| sp P46844 BIEA_RAT           | Biliverdin reductase A                                                         | 0.6  | 0.0007787   |
| sp P0C089 PTPM1_RAT          | Phosphatidylglycerophosphatase and protein-tyrosine phosphatase 1              | 0.6  | 0.01126     |
| tr Q6AYC0 Q6AYC0_RAT         | HAUS augmin-like complex, subunit 4                                            | 0.6  | 0.03664     |
| tr G3V6A9 G3V6A9_RAT         | Microfibril-associated protein 4                                               | 0.6  | 0.002131    |
| sp Q5XIE1 THEM6_RAT          | Protein THEM6                                                                  | 0.6  | 0.01505     |
| sp Q5XIL3 RPC3_RAT           | DNA-directed RNA polymerase III subunit RPC3                                   | 0.61 | 0.003253    |
| tr A0A0U1RRX6 A0A0U1RRX6_RAT | 5-demethoxyubiquinone hydroxylase, mitochondrial (Fragment)                    | 0.61 | 0.01683     |
| sp Q5BJT4 TXD15_RAT          | Thioredoxin domain-containing protein 15                                       | 0.61 | 0.0008456   |
| tr Q5XIH1 Q5XIH1_RAT         | Asporin                                                                        | 0.61 | 0.000005075 |
| tr A0A0G2JV49 A0A0G2JV49_RAT | Protein phosphatase 6, regulatory subunit 2                                    | 0.61 | 0.01109     |
| tr M0R5G7 M0R5G7_RAT         | Keratin-associated protein 22-2                                                | 0.61 | 0.0173      |
| tr D3ZML4 D3ZML4_RAT         | Similar to RIKEN cDNA                                                          | 0.62 | 0.007883    |
| tr Q7TNX2 Q7TNX2_RAT         | Liver regeneration-related protein                                             | 0.62 | 0.002522    |
| tr B1H271 B1H271_RAT         | Mitochondrial coenzyme A transporter SLC25A42                                  | 0.62 | 0.001657    |



|                              |                                                                 |      |           |
|------------------------------|-----------------------------------------------------------------|------|-----------|
| tr D3ZDF3 D3ZDF3_RAT         | MRV integration site 1 homolog                                  | 0.63 | 0.02353   |
| tr D3ZCS4 D3ZCS4_RAT         | IQ motif-containing GTPase-activating protein<br>3              | 0.63 | 0.0006522 |
| tr D4A559 D4A559_RAT         | Dematin actin-binding protein                                   | 0.63 | 0.0008044 |
| sp Q5PQN7 LZIC_RAT           | Protein LZIC                                                    | 0.64 | 0.003502  |
| tr A0A0G2JW50 A0A0G2JW50_RAT | Phosphatidylinositol transfer protein,<br>membrane-associated 2 | 0.64 | 0.005186  |
| sp Q9EQT5 TINAL_RAT          | Tubulointerstitial nephritis antigen-like                       | 0.64 | 0.01697   |
| tr D3ZN64 D3ZN64_RAT         | Collagen type XXVIII alpha 1 chain                              | 0.64 | 0.01006   |
| tr D3ZIL6 D3ZIL6_RAT         | Enoyl CoA hydratase domain-containing 2                         | 0.64 | 0.01343   |
| tr D3ZC55 D3ZC55_RAT         | Heat shock 70kDa protein 12A                                    | 0.64 | 0.0004399 |
| tr F1M8I6 F1M8I6_RAT         | Homeodomain-interacting protein kinase 1                        | 0.64 | 0.03932   |
| tr B1H257 B1H257_RAT         | BLOC-1-related complex subunit 5                                | 0.64 | 0.009142  |
| tr A0A0G2JST5 A0A0G2JST5_RAT | Elastin                                                         | 0.64 | 0.004676  |
| tr F1M7B7 F1M7BRAT           | 6-phosphofructo-2-kinase/fructose-2                             | 0.64 | 0.001324  |
| sp P35213 1433B_RAT          | 14-3-3 protein beta/alpha                                       | 0.65 | 0.008167  |
| sp Q4V8B3 MED24_RAT          | Mediator of RNA polymerase II transcription<br>subunit 24       | 0.65 | 0.004873  |
| tr G3V8L3 G3V8L3_RAT         | Lamin A                                                         | 0.65 | 0.003225  |
| sp Q9ES71 GNPAT_RAT          | Dihydroxyacetone phosphate acyltransferase                      | 0.65 | 0.04966   |
| tr D3ZCV5 D3ZCV5_RAT         | Aldehyde dehydrogenase, cytosolic 1                             | 0.65 | 0.01133   |
| tr D4ABN3 D4ABN3_RAT         | Synaptojanin-1                                                  | 0.65 | 0.03416   |
| sp P63031 MPC1_RAT           | Mitochondrial pyruvate carrier 1                                | 0.65 | 0.02843   |
| sp Q9Z1B2 GSTM5_RAT          | Glutathione S-transferase Mu 5                                  | 0.66 | 0.008064  |
| tr Q562B7 Q562B7_RAT         | Ptpn3 protein (Fragment)                                        | 0.66 | 0.00195   |
| tr A0A0G2K6I0 A0A0G2K6I0_RAT | Similar to ribosomal protein S15a                               | 0.66 | 0.004194  |
| sp Q5DT39 KLRI1_RAT          | Killer cell lectin-like receptor subfamily I<br>member 1        | 0.66 | 0.002692  |
| tr A0A0G2JU6 A0A0G2JU6_RAT   | Exosome complex component RRP45                                 | 0.66 | 0.02732   |
| tr G3V927 G3V927_RAT         | Discs, large homolog-associated protein 4                       | 0.66 | 0.04863   |
| sp P31430 DPEP1_RAT          | Dipeptidase 1                                                   | 0.66 | 0.03623   |
| tr D3ZS88 D3ZS88_RAT         | Activating transcription factor 7-interacting<br>protein        | 0.66 | 0.03088   |
| sp P14669 ANXA3_RAT          | Annexin A3                                                      | 0.66 | 0.04388   |

**Table S3. Significant difference protein in Control-VS-10-30 kD samples.**

| Protein Number               | Protein Description                                                                       | Average Ratio | P value   |
|------------------------------|-------------------------------------------------------------------------------------------|---------------|-----------|
| sp P07897 PGCA_RAT           | Aggrecan core protein                                                                     | 1.51          | 0.01236   |
| sp Q9ERB4 CSPG2_RAT          | Versican core protein                                                                     | 1.52          | 0.04654   |
| tr D4A4H5 D4A4H5_RAT         | Stromal cell derived factor 2                                                             | 1.52          | 0.03901   |
| sp Q8CH87 GCNT3_RAT          | Beta-1,3-galactosyl-O-glycosyl-glycoprotein<br>beta-1,6-N-acetylglucosaminyltransferase 3 | 1.52          | 0.04185   |
| sp P62083 RS7_RAT            | 40S ribosomal protein S7                                                                  | 1.53          | 0.04183   |
| tr D3ZIK0 D3ZIK0_RAT         | Glucuronic acid epimerase                                                                 | 1.53          | 0.04154   |
| tr D3ZYI7 D3ZYI7_RAT         | Olfactory receptor                                                                        | 1.54          | 0.007371  |
| tr F1M065 F1M065_RAT         | Junctional adhesion molecule 2                                                            | 1.56          | 0.04396   |
| tr A1L1M0 A1L1M0_RAT         | Protein kinase, cAMP-dependent, catalytic,<br>alpha                                       | 1.56          | 0.04614   |
| sp P47853 PGS1_RAT           | Biglycan                                                                                  | 1.56          | 0.002068  |
| sp Q9QX67 DAP1_RAT           | Death-associated protein 1                                                                | 1.58          | 0.0319    |
| sp P54001 P4HA1_RAT          | Prolyl 4-hydroxylase subunit alpha-1                                                      | 1.58          | 0.0003483 |
| sp P70560 COCA1_RAT          | Collagen alpha-1(XII) chain                                                               | 1.59          | 0.01162   |
| sp Q66H78 PXYP1_RAT          | 2-phosphoxylase phosphatase 1                                                             | 1.59          | 0.03026   |
| tr Q6IFW1 Q6IFW1_RAT         | RCG34348                                                                                  | 1.63          | 0.02319   |
| sp P60572 PANX3_RAT          | Pannexin-3                                                                                | 1.63          | 0.04626   |
| sp P20909 COBA1_RAT          | Collagen alpha-1(XI) chain                                                                | 1.63          | 0.002578  |
| sp P34900 SDC2_RAT           | Syndecan-2                                                                                | 1.64          | 0.01577   |
| tr A7LKE6 A7LKE6_RAT         | R-spondin 3                                                                               | 1.64          | 0.0223    |
| tr Q5XIQ8 Q5XIQ8_RAT         | Hexosyltransferase                                                                        | 1.65          | 0.02586   |
| sp Q62632 FSTL1_RAT          | Follistatin-related protein 1                                                             | 1.7           | 0.01388   |
| sp Q6IE14 TM11L_RAT          | Transmembrane protease serine 11B-like<br>protein                                         | 1.71          | 0.004908  |
| tr D3Z9Z7 D3Z9Z7_RAT         | Collagen beta(1-O)galactosyltransferase 2                                                 | 1.71          | 0.005381  |
| sp Q62751 IREB2_RAT          | Iron-responsive element-binding protein 2                                                 | 1.78          | 0.03392   |
| tr O35515 O35515_RAT         | C-met/hepatocyte growth factor receptor                                                   | 1.8           | 0.004598  |
| tr F1LND0 F1LND0_RAT         | Collagen type XVI alpha 1 chain                                                           | 1.86          | 0.02595   |
| tr A0A0G2K7C2 A0A0G2K7C2_RAT | Kinesin family member 20B                                                                 | 1.9           | 0.02059   |
| tr Q58NB7 Q58NB7_RAT         | Retinoic acid receptor responder                                                          | 1.96          | 0.001302  |
| tr A0A0G2K8V0 A0A0G2K8V0_RAT | Protein tyrosine phosphatase,                                                             | 2.07          | 0.001518  |

|                              |                                                                    |      |            |
|------------------------------|--------------------------------------------------------------------|------|------------|
| sp P01143 CRF_RAT            | Corticoliberin                                                     | 2.27 | 0.0001548  |
| tr D4ACD9 D4ACD9_RAT         | Protein tyrosine phosphatase domain<br>containing 1                | 2.35 | 0.03423    |
| tr Q7TNA8 Q7TNA8_RAT         | L-lactate dehydrogenase                                            | 2.57 | 0.03264    |
| tr M0R7M4 M0R7M4_RAT         | RAD51-associated protein 2                                         | 3.6  | 0.00612    |
| tr A0A096MJ14 A0A096MJ14_RAT | Uncharacterized protein (Fragment)                                 | 4.38 | 0.04871    |
| tr B1H2A3 B1H2A3_RAT         | Bromodomain PHD finger transcription<br>factor                     | 0.23 | 0.003362   |
| tr A0A0G2JSH5 A0A0G2JSH5_RAT | Serum albumin                                                      | 0.41 | 0.000387   |
| tr Q9JKL3 Q9JKL3_RAT         | Apoptosis regulator BAX                                            | 0.48 | 0.02065    |
| tr Q5PQK3 Q5PQK3_RAT         | Tripartite motif-containing 42                                     | 0.5  | 0.005958   |
| tr D3ZVP9 D3ZVP9_RAT         | Solute carrier family 4 member 11                                  | 0.52 | 0.008403   |
| sp P04638 APOA2_RAT          | Apolipoprotein A-II                                                | 0.53 | 0.01744    |
| tr A0A0G2JVN7 A0A0G2JVN7_RAT | Oogenesis 1                                                        | 0.55 | 0.02082    |
| sp Q4V7F2 CREL1_RAT          | Protein disulfide isomerase Creld1                                 | 0.56 | 0.0001455  |
| tr Q63910 Q63910_RAT         | Alpha globin                                                       | 0.56 | 0.03798    |
| tr Q63011 Q63011_RAT         | Zero beta-globin                                                   | 0.56 | 0.04836    |
| sp Q99MB4 CBWD1_RAT          | COBW domain-containing protein 1                                   | 0.58 | 0.03405    |
| tr D3ZIA7 D3ZIA7_RAT         | Anterior gradient 2 ( <i>Xenopus laevis</i> )                      | 0.58 | 0.02856    |
| tr F1M1C9 F1M1C9_RAT         | Phosphorylase b kinase regulatory subunit                          | 0.59 | 0.04483    |
| tr D3ZKQ0 D3ZKQ0_RAT         | Nudix (Nucleoside diphosphate linked<br>moiety X)-type motif 15    | 0.59 | 0.00001754 |
| sp P17988 ST1A1_RAT          | Sulfotransferase 1A1                                               | 0.6  | 0.001972   |
| tr M0R9U2 M0R9U2_RAT         | Ig-like domain-containing protein                                  | 0.6  | 0.02211    |
| tr D3ZPE2 D3ZPE2_RAT         | Family with sequence similarity 222                                | 0.61 | 0.01745    |
| tr Q6MGA0 Q6MGA0_RAT         | MHC class II antigen                                               | 0.62 | 0.01201    |
| tr A0A0G2JSW3 A0A0G2JSW3_RAT | Globin a4                                                          | 0.63 | 0.04567    |
| tr Q5EBA5 Q5EBA5_RAT         | Lipin 3                                                            | 0.64 | 0.03012    |
| sp P31430 DPEP1_RAT          | Dipeptidase 1                                                      | 0.64 | 0.03147    |
| sp O88801 HOME2_RAT          | Homer protein homolog 2                                            | 0.65 | 0.01753    |
| tr G3V927 G3V927_RAT         | Discs, large homolog-associated protein 4<br>( <i>Drosophila</i> ) | 0.65 | 0.04231    |

---

|                    |                                 |      |            |
|--------------------|---------------------------------|------|------------|
| sp P04916 RET4_RAT | Retinol-binding protein         | 0.66 | 0.001538   |
| sp P19527 NFL_RAT  | Neurofilament light polypeptide | 0.66 | 0.00001774 |
